# Supplementary material for: miR126-mediated impaired vascular integrity in Rett syndrome
Source: PubMed Central journal article supplement — bioRxiv. 2024 Oct 13:2024.10.11.617929. Preprint. [Version 1] doi: 10.1101/2024.10.11.617929 (PMC11482880; doi:10.1101/2024.10.11.617929), 2024-10-13
Supplement: media-1.pdf [file media-1.pdf]

## Supplementary information

### miR126-mediated vascular integrity dysfunction in Rett syndrome

**Authors:** Tatsuya Osaki\*<sup>†</sup> 1,2, Zhengpeng Wan<sup>3,4</sup>, Koji Haratani<sup>5</sup>, Ylliah Jin<sup>3,4</sup>, Marco Campisi<sup>5</sup>, David A. Barbie<sup>5</sup>, Roger Kamm\*<sup>3,4</sup>, and Mriganka Sur\*<sup>1</sup>

1. Picower Institute of Learning and Memory, Massachusetts Institute of Technology, Cambridge, United States
2. Whitehead Institute for Biomedical Research, Massachusetts Institute of Technology, Cambridge, United States
3. Department of Mechanical Engineering, Massachusetts Institute of Technology, Cambridge, United States
4. Department of Biological Engineering, Massachusetts Institute of Technology, Cambridge, United States
5. Department of Medical Oncology, Dana-Farber Cancer Institute, Boston, MA 02215, USA

\*Corresponding author. [osaki@mit.edu](mailto:osaki@mit.edu), [rdkamm@mit.edu](mailto:rdkamm@mit.edu), [msur@mit.edu](mailto:msur@mit.edu)

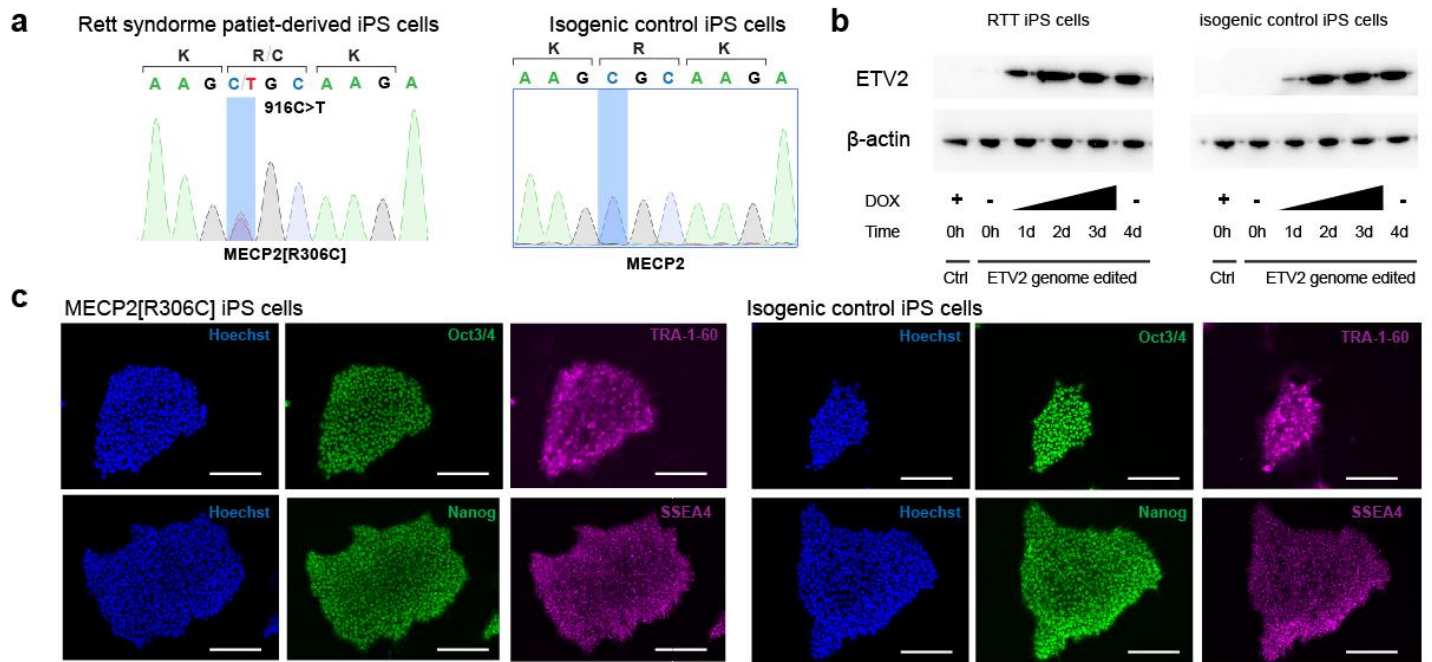

**Supplemental figure. 1 Characterization of Rett syndrome patient-derived iPS cells.** (a) Genotype to confirm MECP2 916c>T mutation in MeCP2[R306C] and isogenic control (b) ETV2 expression in the presence of DOX. (c) Immunostaining of OCT3/4, TRA-1-60 to show the pluripotency in iPS cells.

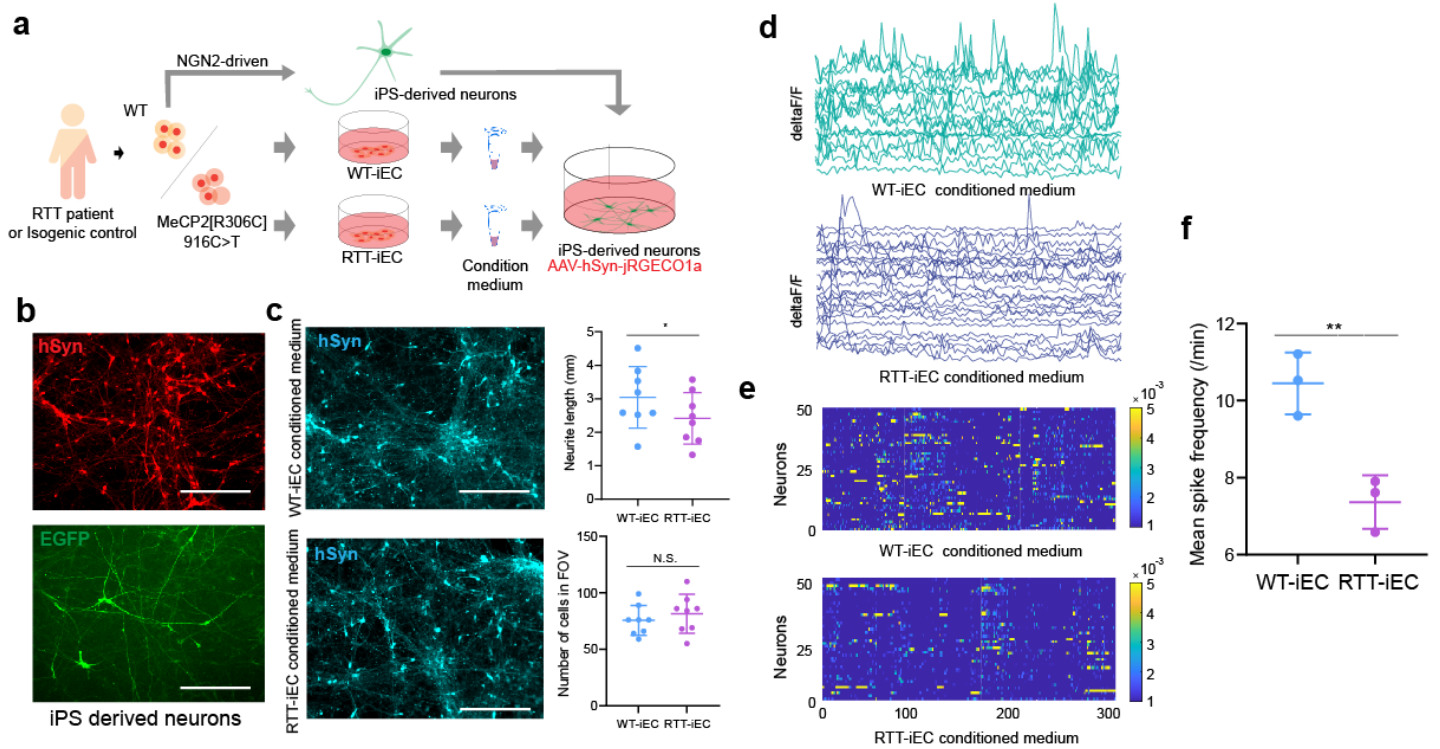

**Supplemental Fig. 2 RTT-iEC condition medium negatively impacted neuronal activity.** (a) Schematic illustration of treatment of WT-iNeurons with condition media from WT-iEC or RTT-iEC. (b) Immunostaining of hSyn to confirm differentiation to neurons from WT-iPS cells which express dox dependent NGN2.  $n = 6$ . (c) Condition medium treatment did not affect morphological change with respect to neurite length and number of cells. (d) Calcium imaging was performed with AAV-hSyn-jRGECO1a. (e, f) Condition medium from RTT-iEC down regulated neuronal activity.  $n = 3$ . Student's t-test, \*\*,  $p < 0.01$ , \*  $p < 0.05$ .

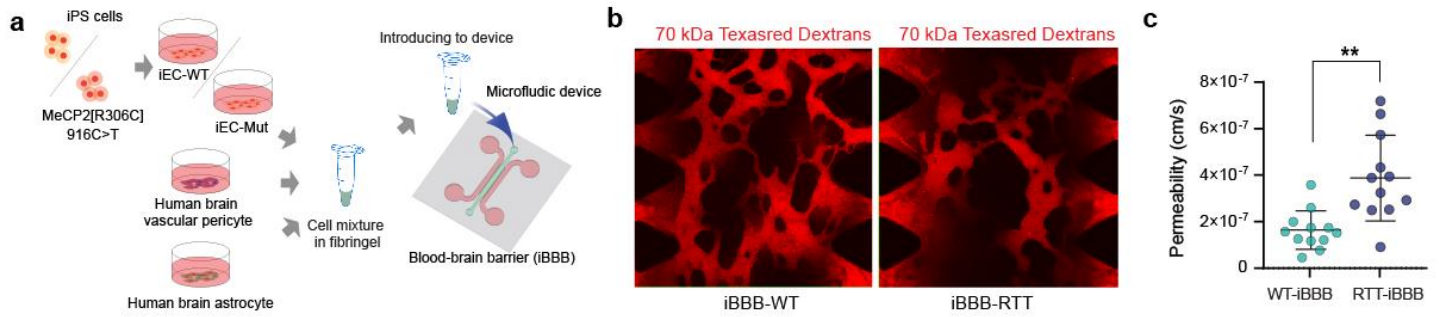

**Supplemental Fig. 3 Engineering BBB in vitro with iEC, pericyte and astrocyte.** (a) Schematic illustration of formation of BBB by co-culturing, endothelial cells, pericytes, and astrocytes in fibrin gel. (b) BBB formation from Rett syndrome patient-derived iEC and isogenic control iEC. (c) RTT-iBBB displayed higher permeability compared to control BBB. n =12. Student's t-test, \*\*,  $p < 0.01$ , \*  $p < 0.05$ .

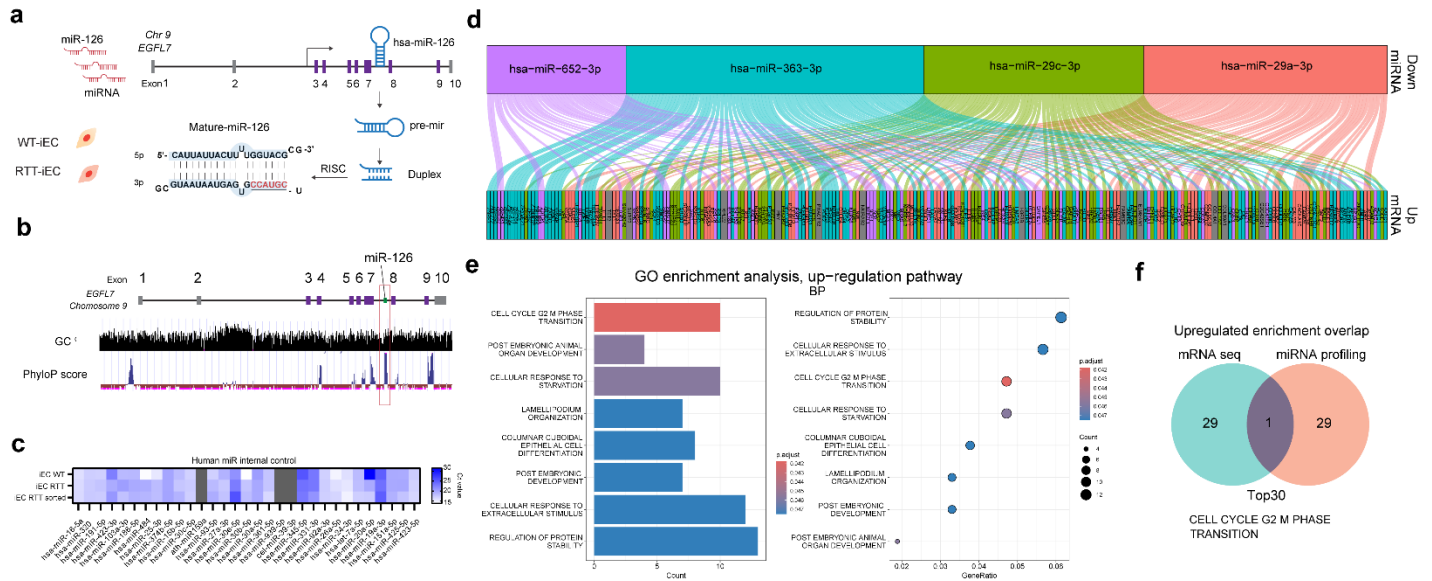

**Supplemental Fig. 4 miR profiling and downregulated miR in RTT-iEC.** (a, b) miR126-3p is endothelial specific microRNA, which is located in intron of EGFL7 and has higher PhyloP score. (c) microRNA internal control that used for normalization of target miR expression. (d) four down-regulated miR in RTT-iEC and target gene predicted by miRDB. (e) GO enrichment analysis by upregulated genes obtained from (d). (f) miRNA-mRNA integrated analysis revealed that overlapped signaling pathway (Cell cycle G2 M phase transition).

**Supplemental table S1. Key resources**

| <b>Reagent and resource</b>                                       | <b>Source</b>     | <b>Identifier</b>  |
|-------------------------------------------------------------------|-------------------|--------------------|
| <b>Cell line</b>                                                  |                   |                    |
| Rett syndrome patient derived iPS cells<br>(female, 8Y, missence) | Coriell Institute | WIC05i-127-325(MT) |
| Isogenic control pair, wild type                                  | Coriell Institute | WIC04i-127-33(WT)  |
| AAVpro 293T                                                       | Takara            | N.A.               |
| <b>Plasmid</b>                                                    |                   |                    |
| pUCM-AAVS1-TO-hNGN2                                               | Addgene           | # 105840           |
| pUCM-AAVS1-TO-hETV2                                               | This study        | N.A.               |
| PX458-AAVS1                                                       | Addgene           | #113194            |
| pRSV-Rev                                                          | Addgene           | #12253             |
| pMDLg/pRRE                                                        | Addgene           | #12251             |
| pMD2.G                                                            | Addgene           | #12259             |
| miRZip-126-3p anti-miR-126-3p microRNA<br>construct               | SBI               | MZIP126-3p-PA-1    |
| miRZip™ & pGreenPuro™ shRNA Scramble<br>Hairpin Negative Control  | SBI               | MZIP000-PA-1       |

**Supplemental table S2.**

| <b>Gene</b>   | <b>Forward primer 5'-3'</b> | <b>Reverse primer 5'-3'</b>   |
|---------------|-----------------------------|-------------------------------|
| <b>CD31</b>   | AACAGTGTTGACATGAAGAGCC      | TGTA AACAGCAGCACGTCATCCTT     |
| <b>ZO-1</b>   | CAACATACAGTGACGCTTCACA      | CACTATTGACGTTTCCCCACTC        |
| <b>OCLDN</b>  | ACAAGCGGTTTTATCCAGAGTC      | GTCATCCACAGGCGAAGTTAAT        |
| <b>CLDN5</b>  | CTCTGCTGGTTCGCCAACAT        | CAGCTCGTACTTCTGCGACA          |
| <b>PGP</b>    | TGACCCGCACTTCAGCTAC         | GGGCTTCCCGATGATGTCTG          |
| <b>LRP1</b>   | AGCCAGCTATGCACCAACAC        | CCTTGCAGGAGCGGTTATC           |
| <b>LAT1</b>   | CCGTGAACTGCTACAGCGT         | CTTCCCGATCTGGACGAAGC          |
| <b>hTfR</b>   | GGCTACTTGGGCTATTGTAAAGG     | CAGTTTCTCCGACA ACTTTCTCT      |
| <b>GLUT1</b>  | TCTGGCATCAACGCTGTCTTC       | CGATACCGGAGCCAATGGT           |
| <b>ABCA</b>   | ACCCACCCTATGAACAACATGA      | GAGTCGGGTAACGGAAACAGG         |
| <b>CAT1</b>   | ATCATCGGTACTTCAAGCGTAGC     | GGCGTTCAGAGTCATGTGTGT         |
| <b>MRP1</b>   | AAGGAGGTACTAGGTGGGCTT       | CCAGTAGGACCCTTCGAGC           |
| <b>MARP4</b>  | AGCTGAGAATGACGCACAGAA       | ATATGGGCTGGATTACTTTGGC        |
| <b>MCT1</b>   | AGGTCCAGTTGGATACACCCC       | GCATAAGAGAAGCCGATGGAAAT       |
| <b>EGFL7</b>  | TGCAGACGGTACACTCTGTGTG      | TGCAGCCTCTGCACTTCTTCT         |
| <b>IGFBP2</b> | CGAGGGCACTTGTGAGAAGCG       | TGTTTCATGGTGCTGTCCACGTG       |
| <b>VEGFA</b>  | AGTCTGTCTGTCAGTAGCACCA      | ACTGGAGCCATACTCATCCGAG        |
| <b>NFKBIA</b> | TCCACTCCATCCTGAAGGCTAC      | CAAGGACACCAAAGCTCCACG         |
| <b>HIF1a</b>  | TATGAGCCAGAAGA ACTTTTAGGC   | CACCTCTTTTGGCAAGCATCCTG       |
| <b>ADAM9</b>  | CTTGCTGCGAAGGAAGTACCTG      | CACTCACTGGTTTTTCTCGGC         |
| <b>PIK3R2</b> | CAGTACAACGCCAAGCTGGACA      | TGCTGGTGGTAGACCTTGAGCT        |
| <b>SPRED1</b> | CAGCCAGGCTTGGACATTCA        | TGGGACTTTAGGCTTCCACAT         |
| <b>TEK</b>    | TTAGCCAGCTTAGTTCTCTGTGG     | AGCATCAGATAACAAGAGGTAGGG      |
| <b>EDN1</b>   | AGAGTGTGTCTACTTCTGCCA       | CTTCCAAGTCCATACGGAACAA        |
| <b>FOXO1</b>  | TGATAACTGGAGTACATTTGCC      | CGGTCATAATGGGTGAGAGTCT        |
| <b>ANGPT2</b> | CTCGAATACGATGACTCGGTG       | TCATTAGCCACTGAGTGTTGTTT       |
| <b>GAPDH</b>  | TGT GGG CAT CAA TGG ATT TGG | ACA CCA TGT ATT CCG GGT CAA T |
